# Supplementary material
Source: publisher figshare collection journal article supplement (https://geolsoc.figshare.com/ndownloader/files/5424980)
Supplement: Supplementary file 1 [file 5424980]

Sample,Grain spot,178Hf/177Hf,1s,176Yb/177Hf,1s,176Hf/177Hf,1s,176Lu/177Hf,1s,Age (Ma),176Hf/177Hf (t),2s,epsilonHf (t),2s,TDM (Ma),TDMC (Ma)
SA12-24,SA12-24-02,1.46725,0.00004,0.09134,0.0025,0.28224,0.000014,0.002258,0.000079,1061,0.282195,0.000028,2.9,1,1460,1673
SA12-24,SA12-24-05,1.46728,0.00004,0.04563,0.00094,0.282222,0.000009,0.000863,0.000015,1061,0.282205,0.000018,3.3,0.6,1432,1651
SA12-24,SA12-24-17,1.46727,0.00003,0.04143,0.0028,0.282261,0.000014,0.000815,0.00005,1061,0.282245,0.000028,4.7,1,1377,1564
SA12-24,SA12-24-19,1.46723,0.00002,0.0709,0.00075,0.282242,0.000015,0.001403,0.000019,1061,0.282214,0.00003,3.6,1.1,1425,1631
SA12-24,SA12-24-24,1.46726,0.00003,0.11376,0.0015,0.282265,0.000017,0.002824,0.000076,1061,0.282209,0.000034,3.4,1.2,1447,1643
SA12-24,SA12-24-32,1.46728,0.00002,0.05229,0.00065,0.282239,0.000008,0.001068,0.000015,1061,0.282218,0.000016,3.7,0.6,1416,1623
SA12-24,SA12-24-39,1.46724,0.00003,0.05233,0.00099,0.282247,0.000012,0.001079,0.000026,1061,0.282225,0.000024,4,0.9,1406,1606
SA12-24,SA12-24-43,1.46729,0.00002,0.03716,0.00076,0.282213,0.000011,0.00075,0.000011,1061,0.282198,0.000022,3,0.8,1440,1666
SA12-24,SA12-24-42,1.46723,0.00002,0.11682,0.004,0.282266,0.000013,0.002084,0.000068,1061,0.282224,0.000026,4,0.9,1417,1609
SA12-24,SA12-24-46,1.46725,0.00003,0.06254,0.00074,0.282233,0.000012,0.001208,0.00001,1061,0.282209,0.000024,3.4,0.9,1430,1642
SA12-24,SA12-24-56,1.46726,0.00003,0.06728,0.0033,0.282265,0.000011,0.001268,0.000055,1061,0.28224,0.000022,4.5,0.8,1388,1575
SA12-24,SA12-24-59,1.46731,0.00002,0.10074,0.0017,0.282272,0.000013,0.002061,0.000078,1061,0.282231,0.000026,4.2,0.9,1407,1594
SA12-24,SA12-24-69,1.46718,0.00004,0.09508,0.0022,0.282247,0.000019,0.002375,0.000042,1061,0.282199,0.000038,3.1,1.3,1455,1663
SA13/133,SA13/133-02,1.46719,0.00002,0.05112,0.00047,0.282289,0.000013,0.000976,0.000007,1086,0.282269,0.000026,6.1,0.9,1344,1495
SA13/133,SA13/133-03,1.46728,0.00004,0.04859,0.00077,0.282352,0.000016,0.001192,0.00002,1086,0.282328,0.000032,8.2,1.1,1264,1367
SA13/133,SA13/133-07,1.46717,0.00002,0.04952,0.0014,0.282299,0.000015,0.001128,0.000047,1086,0.282276,0.00003,6.3,1.1,1335,1480
SA13/133,SA13/133-11,1.46715,0.00003,0.06584,0.0011,0.282341,0.000018,0.001475,0.000059,1086,0.282311,0.000036,7.6,1.3,1289,1404
SA13/133,SA13/133-13,1.46727,0.00002,0.03711,0.00052,0.282315,0.00001,0.000755,0.00001,1086,0.2823,0.00002,7.2,0.7,1300,1428
SA13/133,SA13/133-28,1.46726,0.00003,0.06128,0.0018,0.282316,0.000011,0.001217,0.000029,1086,0.282291,0.000022,6.9,0.8,1315,1447
SA13/133,SA13/133-29,1.46728,0.00002,0.07248,0.0011,0.28234,0.000016,0.001439,0.000026,1086,0.282311,0.000032,7.6,1.1,1289,1404
SA13/133,SA13/133-30,1.46719,0.00003,0.07597,0.0014,0.282351,0.000014,0.001506,0.000051,1086,0.28232,0.000028,7.9,1,1276,1383
SA13/133,SA13/133-39,1.46727,0.00003,0.03319,0.00062,0.282295,0.000013,0.000653,0.000012,1086,0.282282,0.000026,6.6,0.9,1324,1468
SA13/133,SA13/133-51,1.46718,0.00002,0.06181,0.00096,0.282286,0.000014,0.001246,0.000017,1086,0.28226,0.000028,5.8,1,1358,1514
SA13/133,SA13/133-52,1.4673,0.00003,0.06407,0.0029,0.282347,0.000015,0.00128,0.000059,1086,0.282321,0.00003,7.9,1.1,1274,1382
SA13/133,SA13/133-53,1.46725,0.00003,0.05092,0.00069,0.282326,0.00001,0.001022,0.000011,1086,0.282305,0.00002,7.4,0.7,1294,1416
SA13/133,SA13/133-54,1.46728,0.00003,0.05882,0.002,0.282313,0.000013,0.00117,0.000038,1086,0.282289,0.000026,6.8,0.9,1317,1451
SA13/133,SA13/133-55,1.46725,0.00002,0.04677,0.00047,0.282325,0.000011,0.000933,0.000006,1086,0.282306,0.000022,7.4,0.8,1293,1414
SA13/133,SA13/133-56,1.46729,0.00003,0.08536,0.0033,0.282383,0.000014,0.001634,0.000058,1086,0.28235,0.000028,9,1,1235,1319
,,,,,,,,,,,,,,,,
Decay constant: 1.867*10^-11 Soderlund et al. (2004).,,,,,,,,,,,,,,,,
CHUR-values: Bouvier et al. (2008),,,,,,,,,,,,,,,,
Depleted mantle values: Griffin et al. (2000) recalculated using decay constant and CHUR-values from,,,,,,,,,,,,,,,,
"Soderlund and Bouvier et al. (2008), respectively.",,,,,,,,,,,,,,,,
,,,,,,,,,,,,,,,,
TDM: Model age calculated using measured 176Lu/177Hf and 176Hf/177Hf.,,,,,,,,,,,,,,,,
"TDMC: Model age calculated using 176Lu/177Hf = 0.015 (similar to average continental crust (Griffin et al. 2002, 2004)),",,,,,,,,,,,,,,,,
projected through initial 176Hf/177Hf.,,,,,,,,,,,,,,,,
,,,,,,,,,,,,,,,,
"Bouvier, A., Vervoort, J.D., Patchett, P.J., 2008. The Lu-Hf and Sm-Nd isotopic composition of CHUR: ",,,,,,,,,,,,,,,,
"Constraints from unequilibrated chondrites and implications for the bulk composition of terrestrial planets. Earth And Planetary Science Letters 273, 48-57.",,,,,,,,,,,,,,,,
,,,,,,,,,,,,,,,,
"Griffin, W.L., Pearson, N.J., Belousova, E., Jackson, S.E., Van Achterberg, E., O?Reilly, S.Y., Shee, S.R., 2000. The Hf isotope composition of cratonic mantle: ",,,,,,,,,,,,,,,,
"LAM-MC-ICPMS analysis of zircon megacrysts in kimberlites. Geochimica et Cosmochimica Acta 64, 133-147.",,,,,,,,,,,,,,,,
,,,,,,,,,,,,,,,,
"Griffin, W.L., Wang, X., Jackson, S.E., Pearson, N.J., O'Reilly, S.Y., Xu, X.S., Zhou, X. M., 2002. Zircon chemistry and magma mixing, SE China:",,,,,,,,,,,,,,,,
" In-situ analysis of Hf isotopes, Tonglu and Pingtan igneous complexes. Lithos 61, 237-269.",,,,,,,,,,,,,,,,
,,,,,,,,,,,,,,,,
"Griffin, W.L., Belousova, E.A., Shee, S.R., Pearson, N.J., O'Reilly, S.Y., 2004. Archean crustal evolution in the northern Yilgam Craton: ",,,,,,,,,,,,,,,,
"U-Pb and Hf-isotope evidence from detrital zircons. Precambrian Research 131, 231-282.",,,,,,,,,,,,,,,,
,,,,,,,,,,,,,,,,
"Soderlund, U., Patchett, J.P., Vervoort, J.D. & Isachsen, C.E., 2004. The Lu-176 decay constant determined by Lu-Hf and U-Pb isotope systematics of ",,,,,,,,,,,,,,,,
"Precambrian mafic intrusions. Earth And Planetary Science Letters 219, 311-324.",,,,,,,,,,,,,,,,
